# Supplementary material for: High-throughput RNAi screening for novel modulators of vimentin expression identifies MTHFD2 as a regulator of breast cancer cell migration and invasion
Source: PubMed Central journal article supplement (PMC3702207; doi:10.18632/oncotarget.756), 2012-12-17
Supplement: oncotarget-04-048-s001.pdf [file oncotarget-04-048-s001.pdf]

## High-throughput RNAi screening for novel modulators of vimentin expression identifies MTHFD2 as a regulator of breast cancer cell migration and invasion - Lehtinen et al

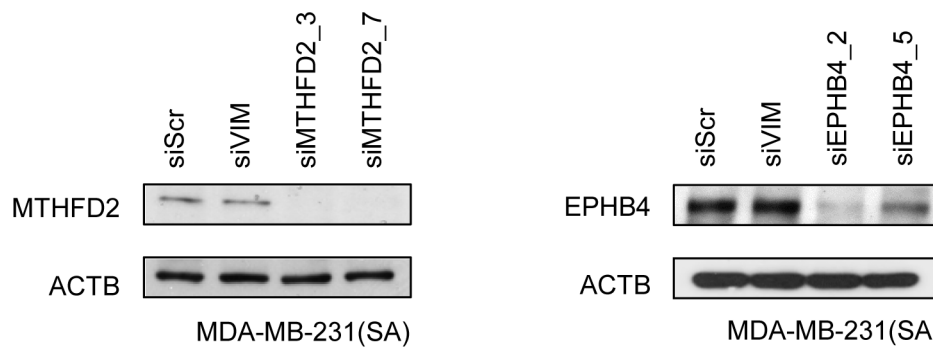

Supplementary Figure S1: Analysis of MTHFD2 and EPHB4 protein expression in MDA-MB-231(SA) cells in response to 120 h vimentin or target gene silencing.

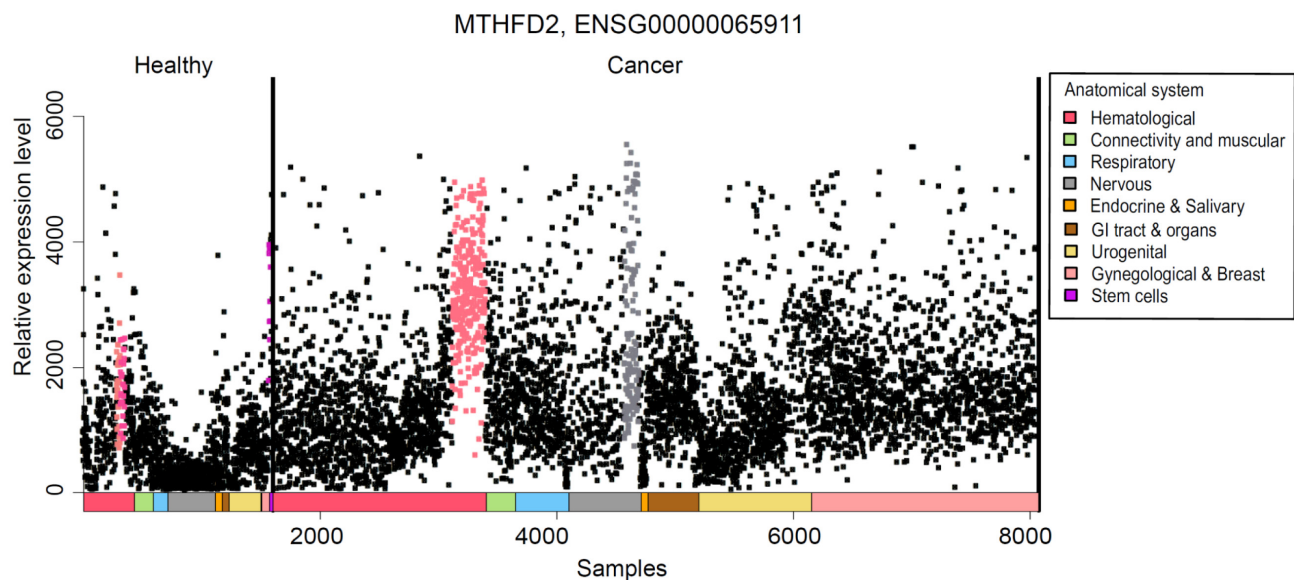

Supplementary Figure S2: MTHFD2 mRNA expression in normal and malignant tissues (n=9783) present in GeneSapiens database ([www.genesapiens.com](http://www.genesapiens.com)).

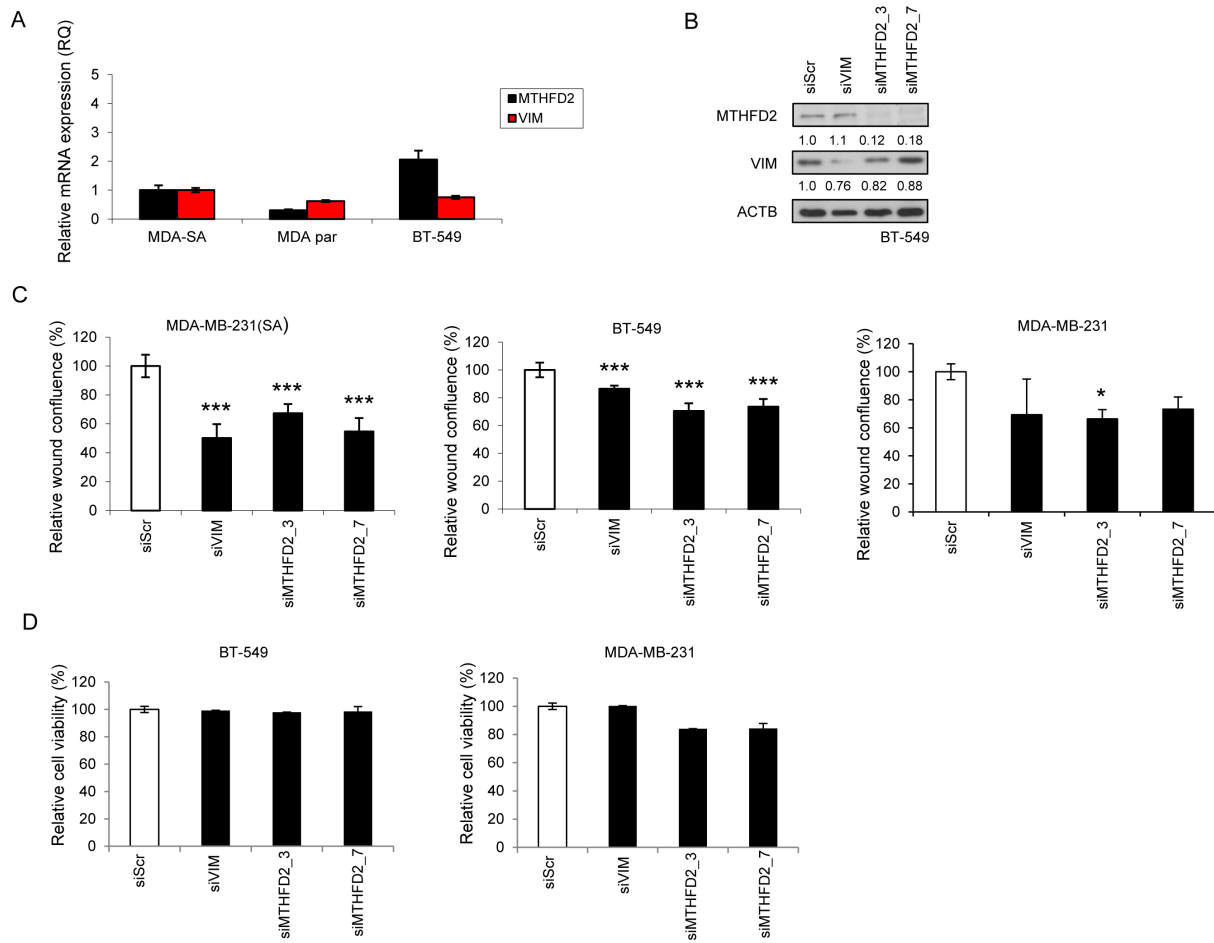

**Supplementary Figure S3:** A: MTHFD2 and vimentin mRNA expression in MDA-MB-231, MDA-MB-231(SA) and BT-549 breast cancer cells. B: Analysis of MTHFD2 and vimentin protein expression in BT-549 cells after 120 h transfection with either scrambled control siRNA (siScr), vimentin targeting siRNA (siVIM) or MTHFD2 targeting siRNA (siMTHFD2). C: Quantification of wound healing experiment in MDA-MB-231(SA), BT-549 and MDA-MB-231 cells. D: Analysis of cell viability in response to transient silencing of vimentin and MTHFD2 in, BT-549 and MDA-MB-231 cells. The statistically significant p-values are indicated with asterisks (\* P<0.05; \*\* P<0.01; \*\*\* P<0.005).

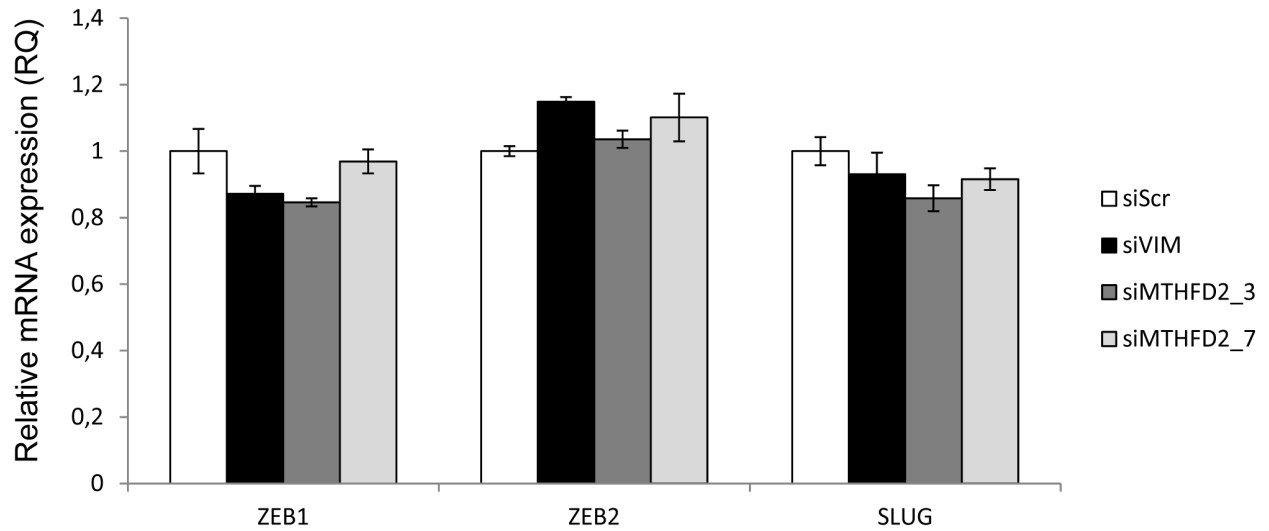

Supplementary Figure S4: Analysis of ZEB1, ZEB2 and SLUG mRNA expression after 72 h transient MTHFD2 knockdown.

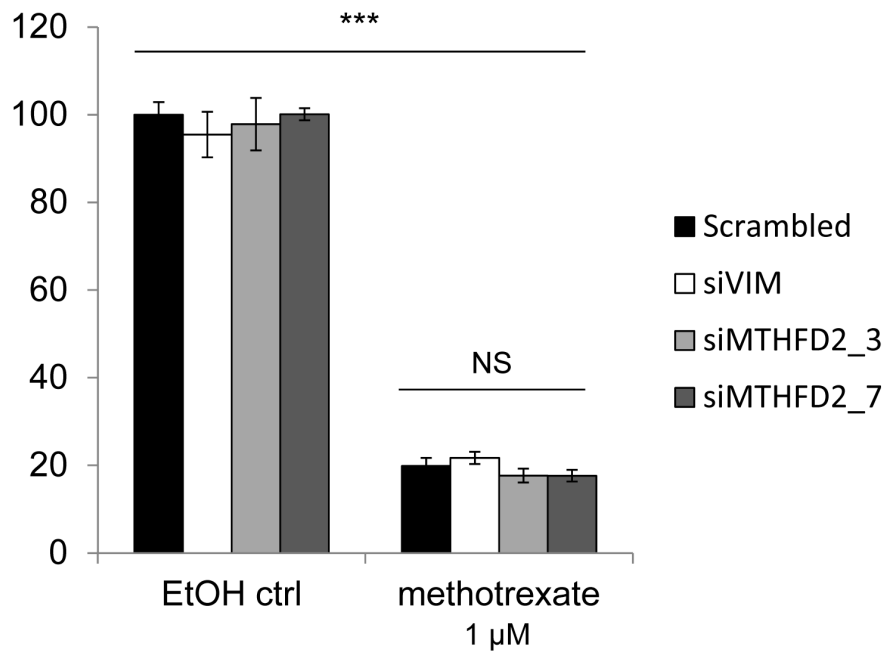

Supplementary Figure S5: Analysis of cell viability in response to MTHFD2 knockdown and treatment with 1 μM methotrexate (\*\*p < 0.005, NS = non significant).
